# Supplementary material
Source: PubMed Central journal article supplement (PMC4253527)
Supplement: embj0033-2388-sd1.pdf [file embj0033-2388-sd1.pdf]

# Figure S1 (related to Figure 1)

## A

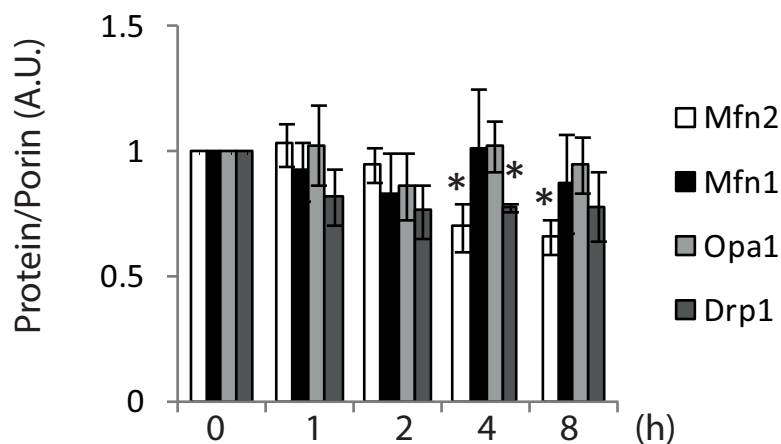

## B

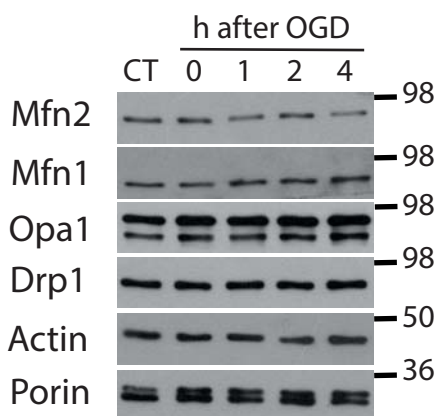

## C

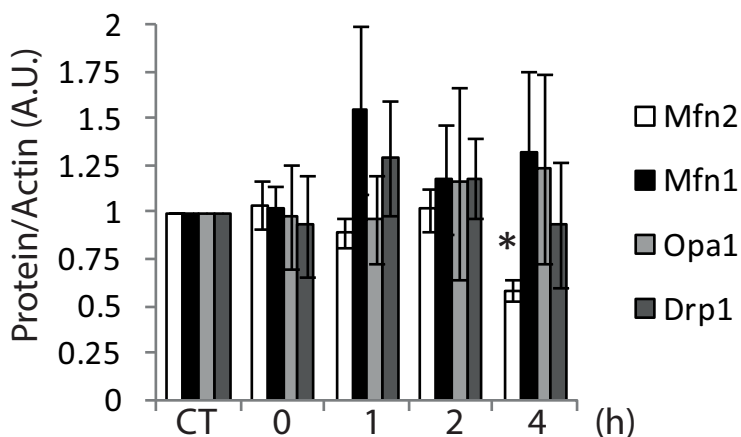

## D

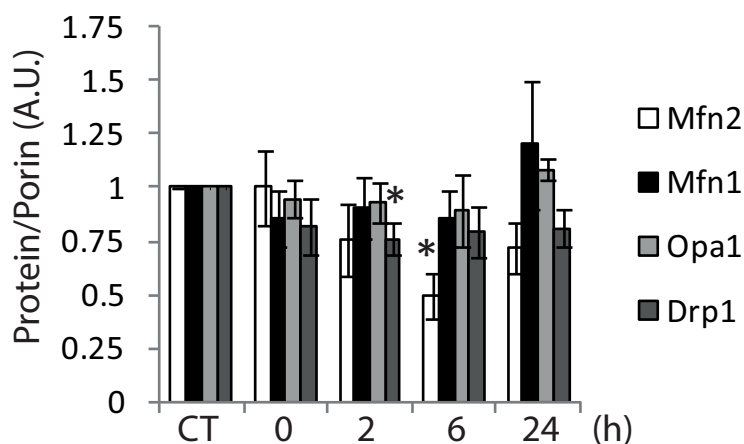

**Figure S1.** A) Densitometric analysis normalized to porin of western blots of the indicated mitochondrial fusion/fission proteins in *in vitro* primary cortical neurons exposed to NMDA (30  $\mu$ M) for the indicated times (n=3–6). B) Western analysis of *in vitro* primary cortical neurons subjected to OGD 1 hour and returned to normoxic conditions and glucose containing medium for the indicated times. C) densitometric analysis normalized to actin from (B). (n=3–4). D) Densitometric analysis normalized to porin of *in vivo* brain extracts of rats subjected to MCAO plus 90 minutes of ipsilateral carotid clamp followed by clamp release for the indicated times (n=3–7). \*p<0.05 compared to control, two-tailed T-test.
