# Supplementary material
Source: PubMed Central journal article supplement (PMC4253527)
Supplement: embj0033-2388-sd3.pdf [file embj0033-2388-sd3.pdf]

# Figure S3 (related to Figure 3)

A

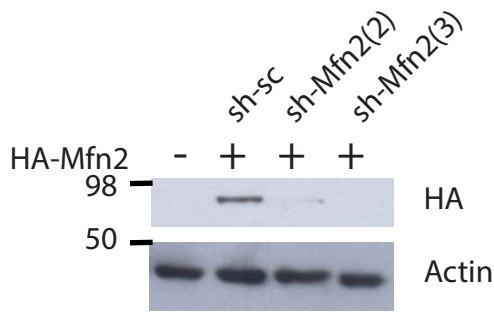

B

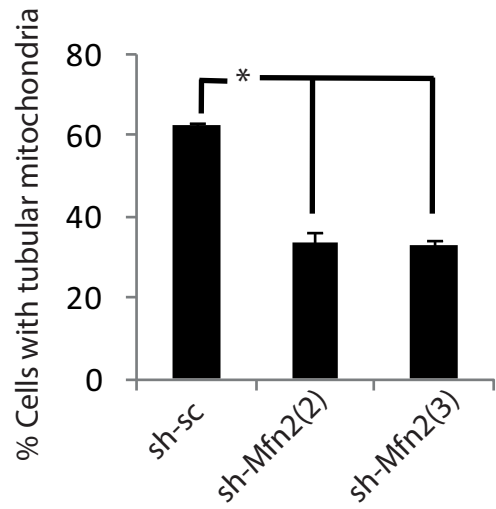

**Figure S3.** A) HEK293 cells were transfected with plasmids encoding HA-Mfn2 plus shRNA targeted against different sequences of Mfn2 (sh-Mfn2) or sh-sc. After 48 hours protein was harvested and subjected to western blot. B) Analysis of mitochondrial morphology in neurons expressing different sh-Mfn2 or sh-sc (n=3). \*p<0.05, two-tailed T-test.
