# Supplementary material
Source: PubMed Central journal article supplement (PMC4253527)
Supplement: embj0033-2388-sd4.pdf [file embj0033-2388-sd4.pdf]

# Figure S4 (related to Figure 4)

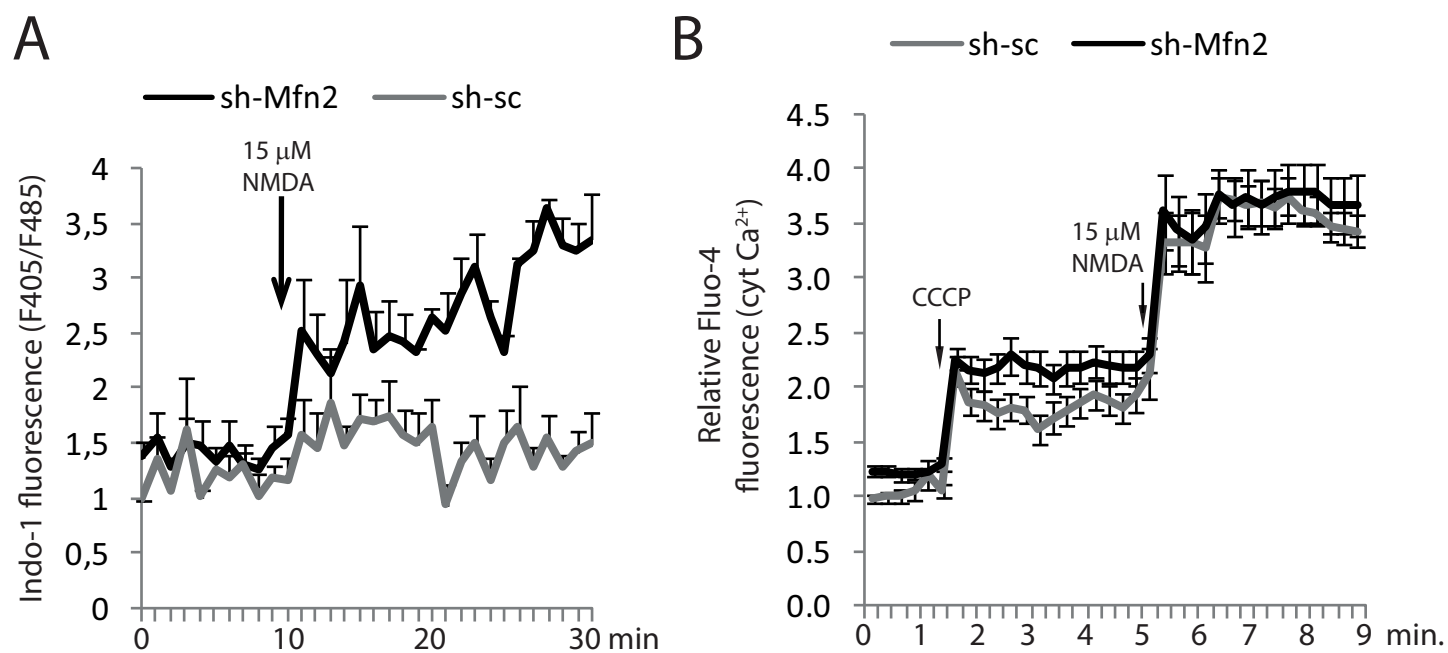

**Figure S4.** A) Determination of intracellular  $Ca^{2+}$  in cortical neurons transduced with AAV producing sh-Mfn2 or sh-sc and treated with NMDA (15  $\mu$ M) (n=3). B) Determination of intracellular  $Ca^{2+}$  in neurons transduced with AAV producing sh-Mfn2 or sh-sc after being depolarized mitochondria with CCCP (10  $\mu$ M) and afterwards treated with 15  $\mu$ M NMDA at the time points indicated by the arrows. (n= 16 neurons from 4 independent experiments).
