# Supplementary material
Source: PubMed Central journal article supplement (PMC4253527)
Supplement: embj0033-2388-sd5.pdf [file embj0033-2388-sd5.pdf]

# Figure S5 (related to Figure 5)

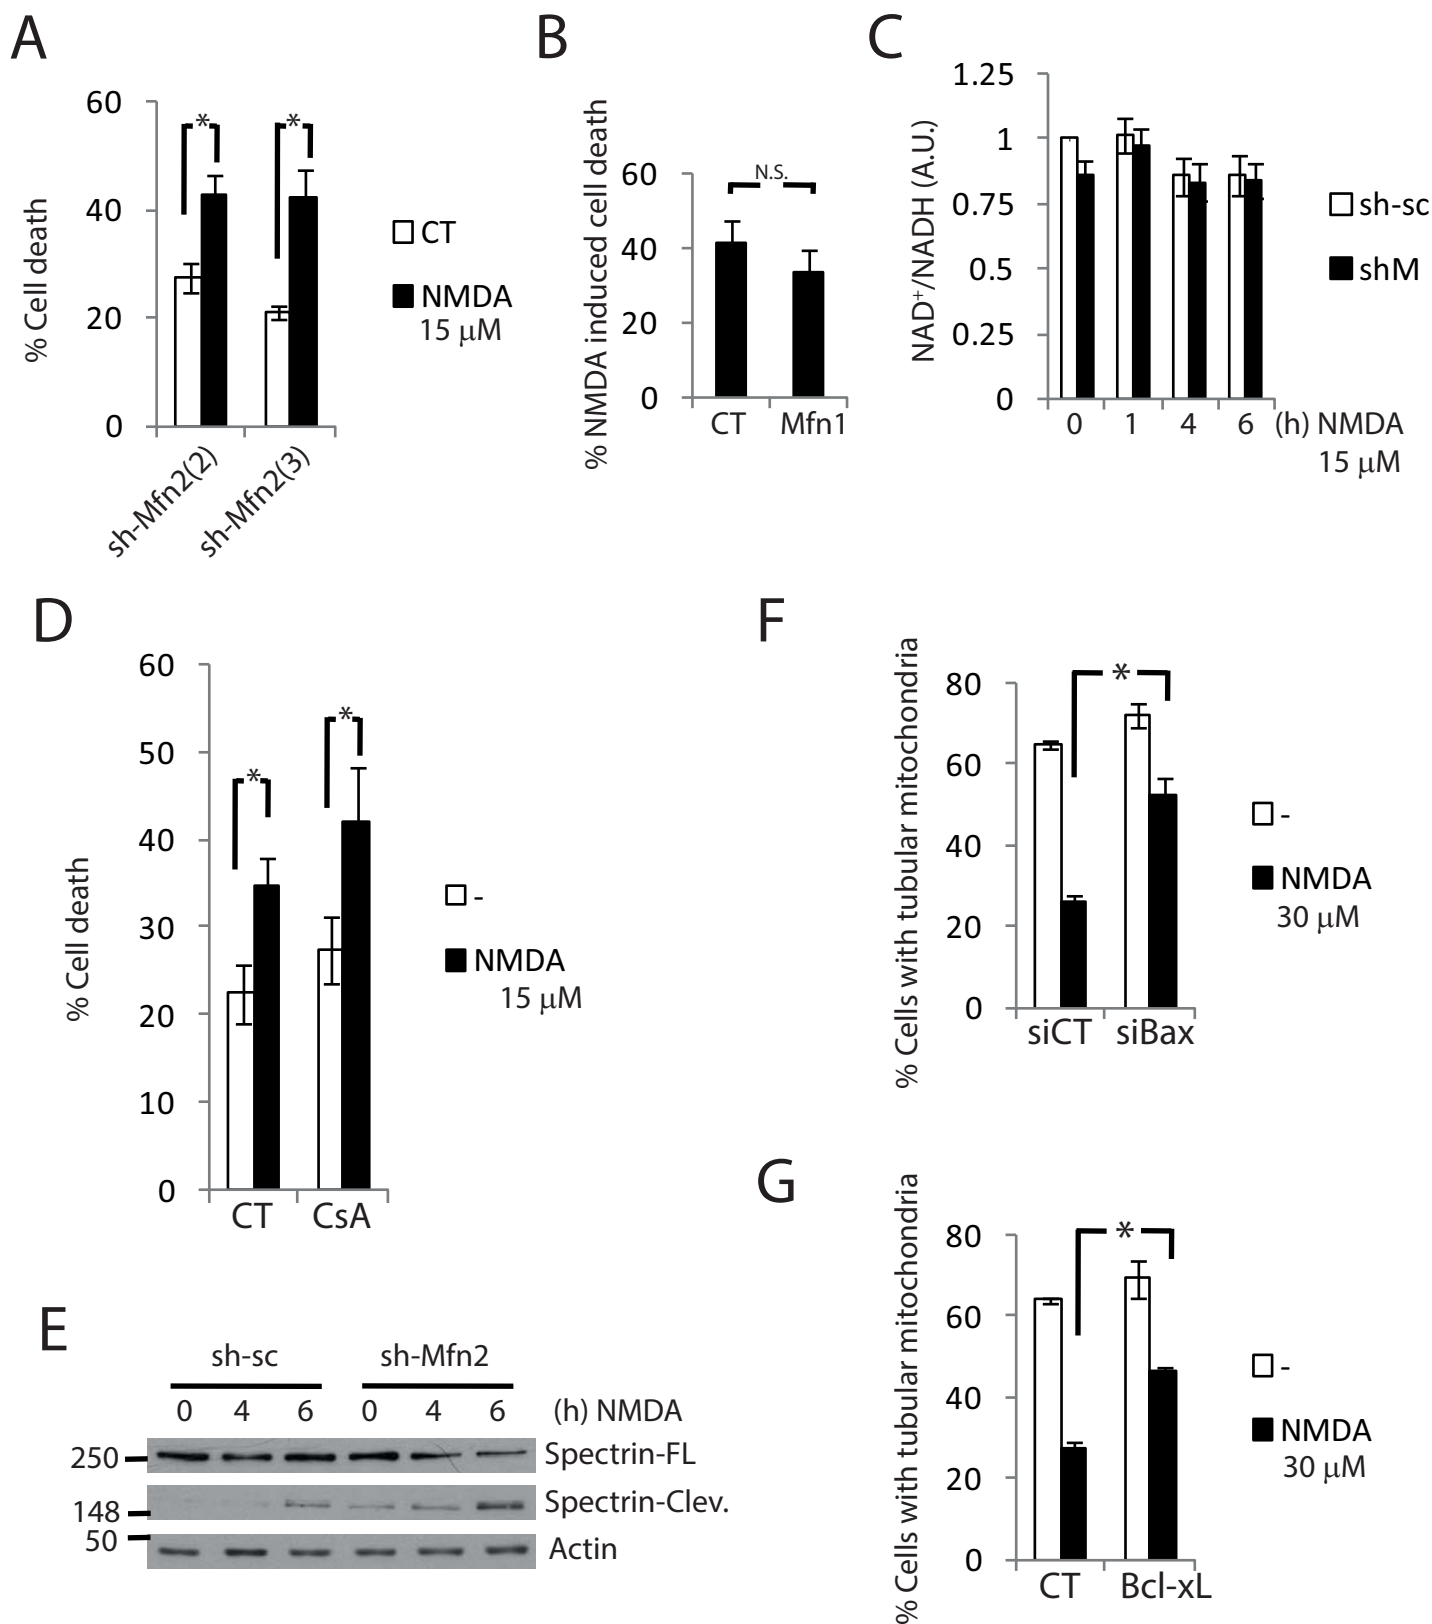

**Figure S5.** Cortical neurons were transfected with plasmids expressing sh-Mfn2 or sh-sc (A) or (B) Mfn1 or control (globin). After 48 hours neurons were treated with NMDA (15  $\mu$ M in (A) or 30  $\mu$ M in (B)) for 6 hours. Neuronal death was analyzed (n=6 in (A), n=8 in (B)). \*p<0.05, two-tailed T-test. C) NMDA (15  $\mu$ M) application for the indicated times to neurons transduced with AAV producing sh-Mfn2 or control sh-sc. NAD<sup>+</sup> and NADH levels were analyzed independently and the ratio calculated (n= 4). Not significant differences found, two-tailed T-test. D) Cell death analysis of neurons expressing sh-Mfn2 and treated with NMDA (15  $\mu$ M) for 6 hours after 45 minutes pretreatment with CsA (1  $\mu$ M). (n= 5). \*p<0.05, two-tailed T-test. E) Representative western blot showing spectrin full length (Spectrin-FL) and spectrin cleaved (spectrin-clev.) in neurons expressing sh-sc or sh-Mfn2 after treatment with 15  $\mu$ M NMDA for the indicated times. (n= 3). Analysis of the mitochondrial morphology of neurons expressing siCT or siBAX (F) or control plasmid (globin) or Bcl-xL (G) and treated with 30  $\mu$ M NMDA for 1 hour followed to washout and recovery for 3 hours. (n= 6). \*p<0.05, two-tailed T-test.
