# Supplementary material
Source: PubMed Central journal article supplement (PMC4253527)
Supplement: embj0033-2388-sd6.pdf [file embj0033-2388-sd6.pdf]

# Figure S6 (related to Figure 6)

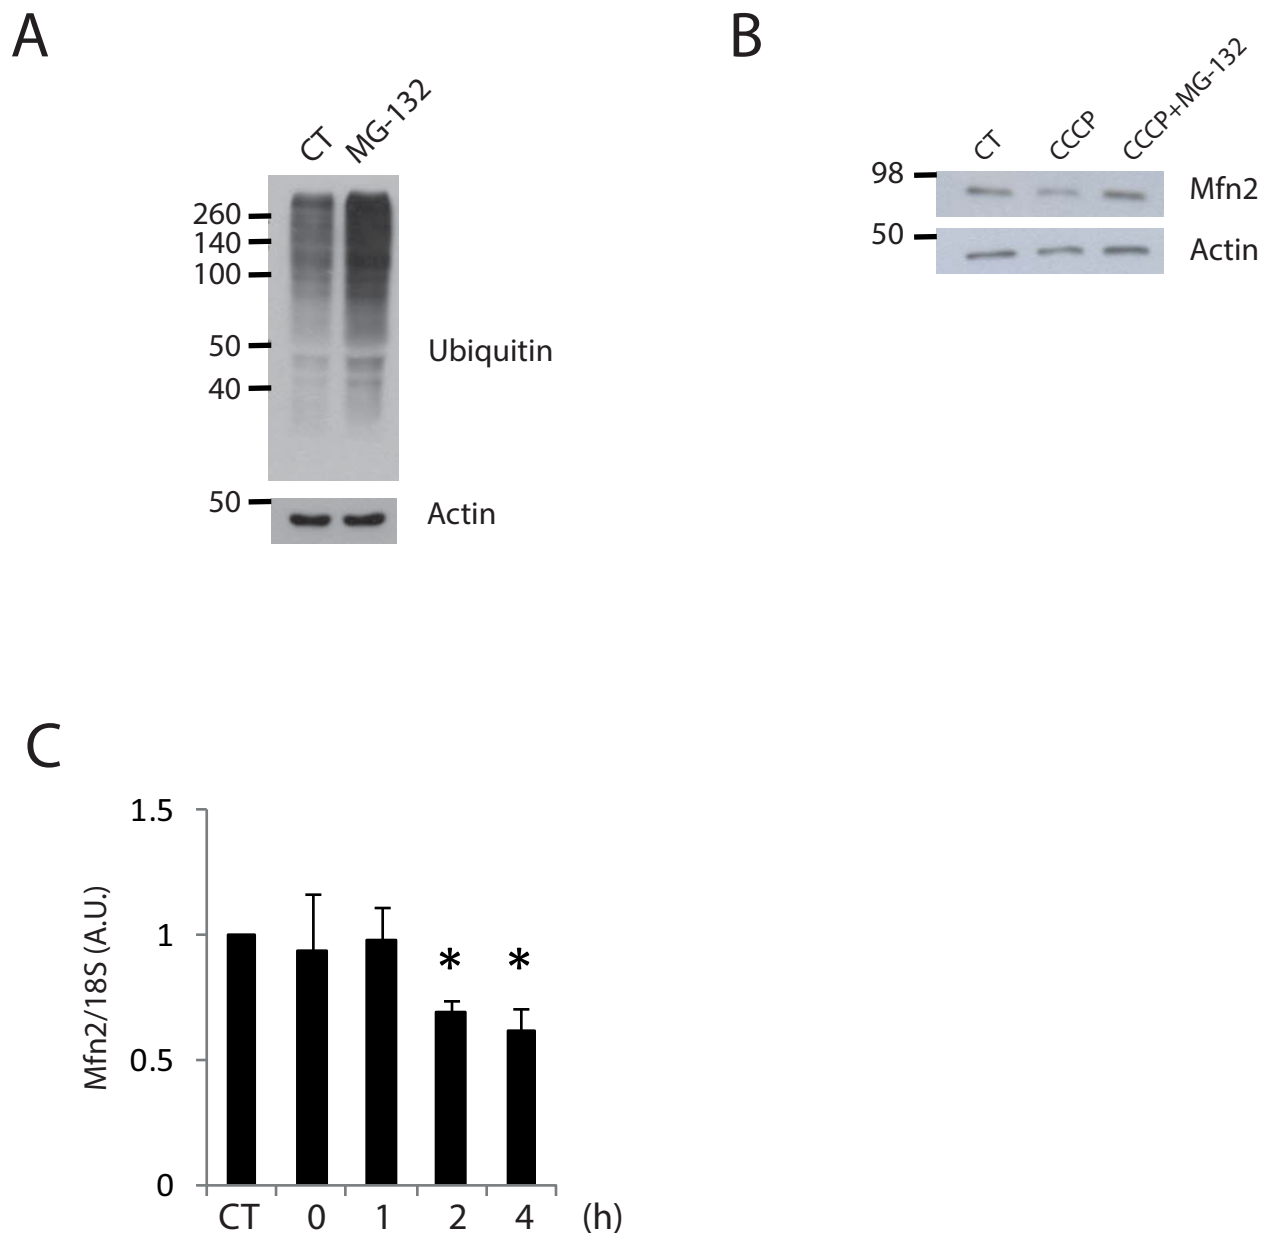

**Figure S6.** A) MG-132 promotes accumulation of ubiquitinated proteins in neurons. Western blot showing ubiquitinated proteins in cortical neurons after 4 hours of treatment with 10  $\mu$ M MG-132. Actin was used as a loading control. B) CCCP dependent degradation of Mfn2 is blocked by the proteasome inhibitor MG-132. Cortical neurons were treated with CCCP (10  $\mu$ M) for 1 h in the absence or presence of MG-132 (10  $\mu$ M). C) Cortical neurons were subjected to OGD for 1 h and for the indicated times and returned to normoxic conditions and glucose containing medium for the indicated times and Mfn2 mRNA expression was determined by real time qPCR. (n=4). \*p<0.05, two-tailed T-test.
