# Supplementary material
Source: PubMed Central journal article supplement (PMC4253527)
Supplement: embj0033-2388-sd7.pdf [file embj0033-2388-sd7.pdf]

# Figure S7 (related to Figure 7)

A

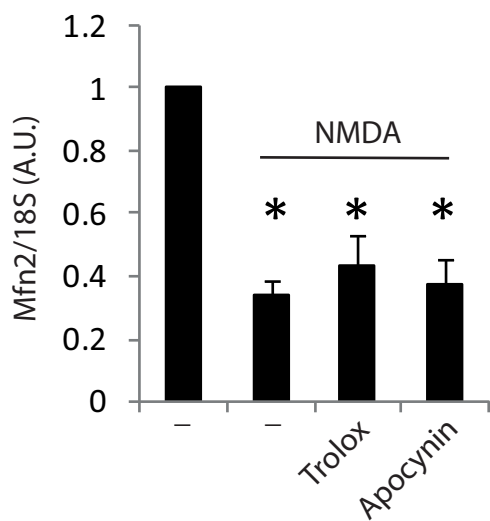

B

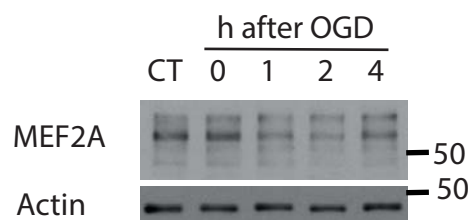

C

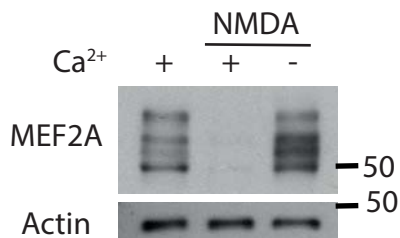

**Figure S7.** A) Cortical neurons were left untreated or treated with trolox (100  $\mu$ M) or apocynin (500  $\mu$ M) for 45 minutes followed with NMDA (30  $\mu$ M) application for 4 h. Mfn2 mRNA expression was analyzed by real time qPCR. (n=4). \*p<0.05, two-tailed T-test. B) MEF2A expression was analyzed by western blot in *in vitro* primary cortical neurons (B) subjected to OGD 1 hour and returned to normoxic conditions and glucose containing medium for the indicated times. (n= 4). C) Treated with NMDA (30  $\mu$ M) for 4 hours in medium with or without Ca<sup>2+</sup>. (n= 4)
