# Supplementary material
Source: PubMed Central journal article supplement (PMC4253527)
Supplement: embj0033-2388-sd8.pdf [file embj0033-2388-sd8.pdf]

# Figure S8 (related to Figure 8)

A

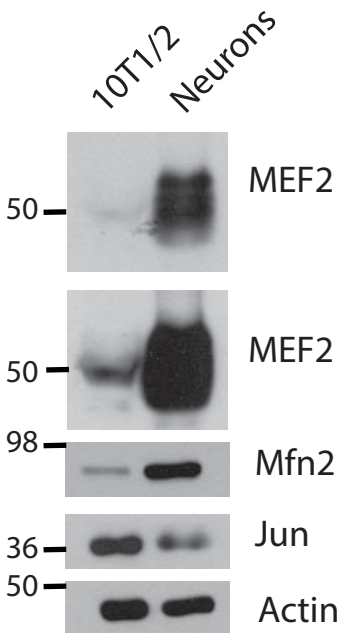

B

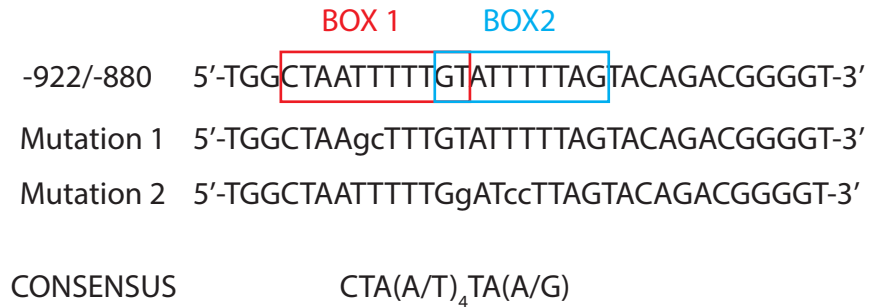

C

-2352 TGTTGGTTCTCTGTAAAAGCCATCTCTCTTGGCCCCAGCCATATTTTATTTATGGCGTGT  
 -2292 GGTTGATGCACACATGTCATGGCTCTCGTATGGAGGTTTAGGGGACAACTTTTTACGAGT  
 -2232 AGGTTCTTTCTTCCATCATGTGGGTTCC **TGGAGATGGAATTCAAGTTGGCAGGCTTGGT**  
 -2172 **AGCAGCCATCTGTACCTACTGAGCCATTTTGTGACCA**CCACTATTAGCTGTAGTTTTAGA  
 -2112 AGT**TAAAAAGAA**ATGGGAGTTTAATTAAGATAATGTATTTTCAATTTAGTCGAGCGAATCCAA  
 -2052 AGT**TATAGCAACAT**TATCAATATGAAAACATTAGTAAGGTAGTTTGCATTTCTTTTTAA**TA**  
 -1992 **ATAAATATTG**GGGCATCTCTCTACAGCAACTACATTTTCAAGTCCTCAGTAGCTACAGGTG

**Figure S8.** A) Western blot analysis to compare the expression of the indicated proteins in primary cortical neurons and 10T1/2 cells. B) Sequence of the two putative MEF2 binding sites found in the Mfn2 human promoter. The mutations of these sequences are in lower case. C) Sequence of the region between -2352/-1392 with respect to the transcription start site of the Mfn2 rat promoter. Shown in red are the putative MEF2 binding sites found using the PROMO and Patch public 1.0 programs. The region amplified in the ChIP experiments is shaded.
