# Supplementary material
Source: PubMed Central journal article supplement (PMC4253527)

Figure 3B

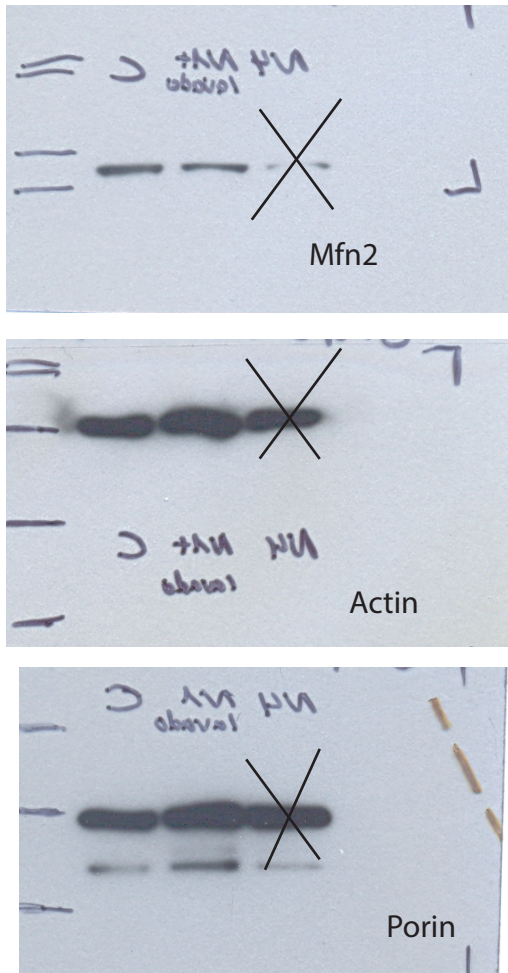

Figure 3C

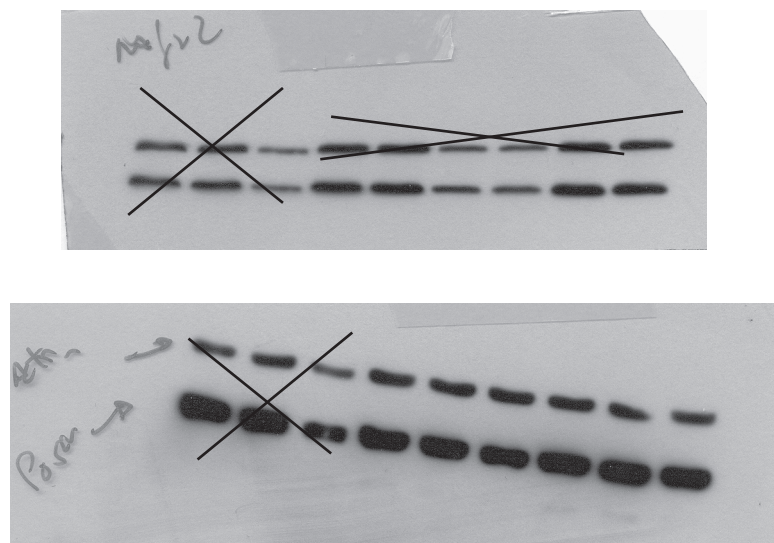

Supplement: embj0033-2388-sd12.pdf [file embj0033-2388-sd12.pdf]

Figure 6A

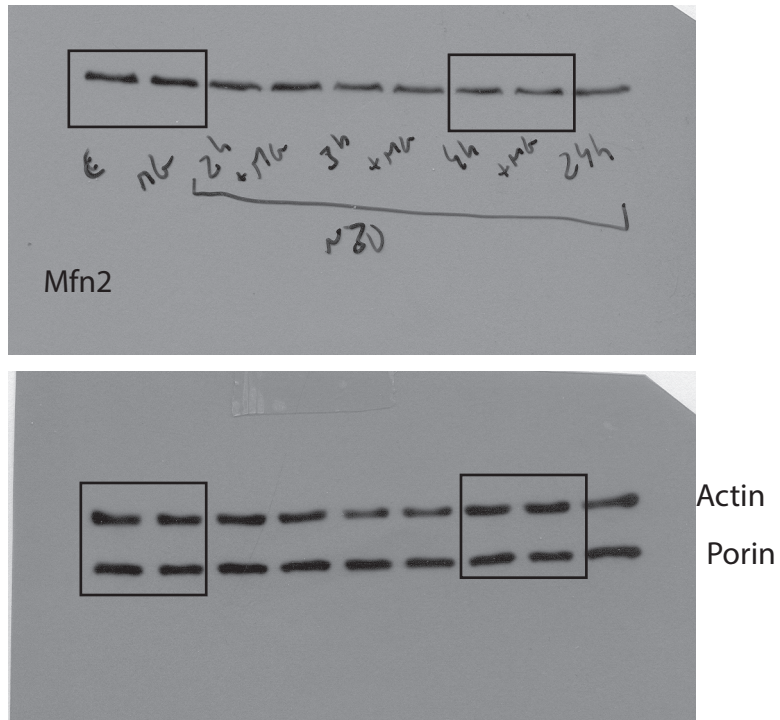

Figure 6D

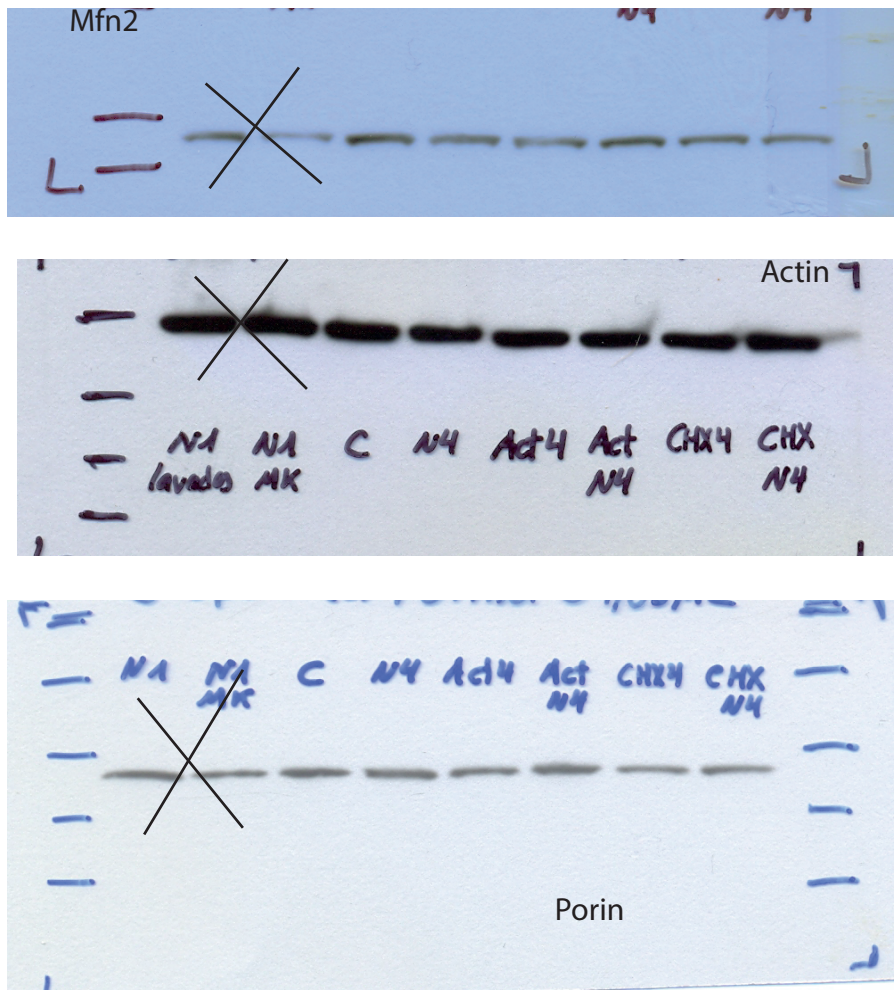

Supplement: embj0033-2388-sd13.pdf [file embj0033-2388-sd13.pdf]

Figure 7A

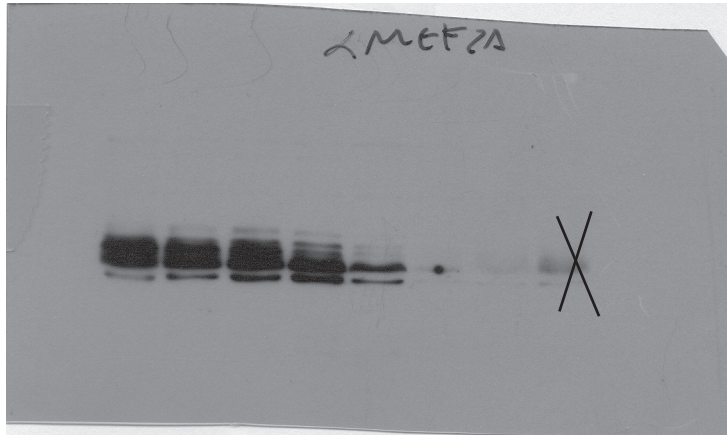

Figure 7B

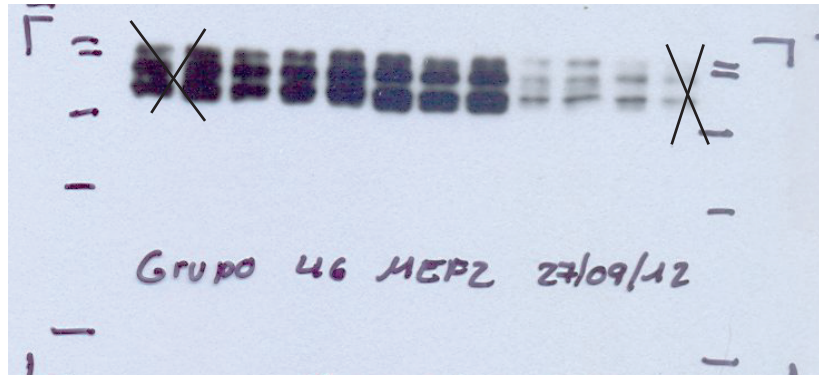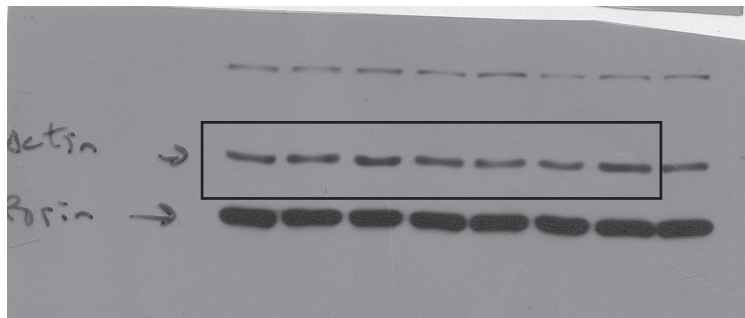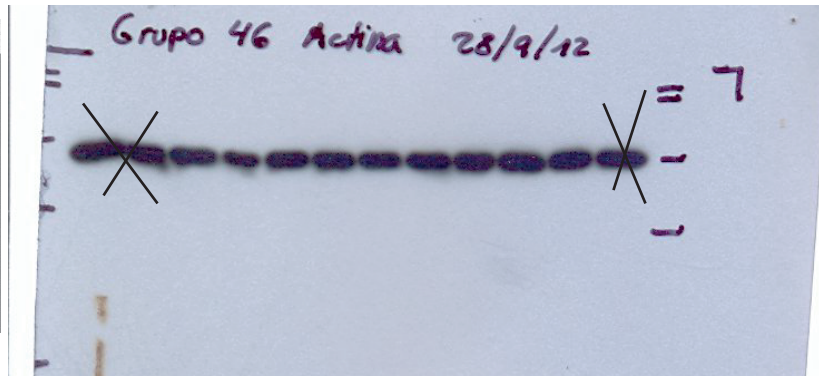

Figure 7C

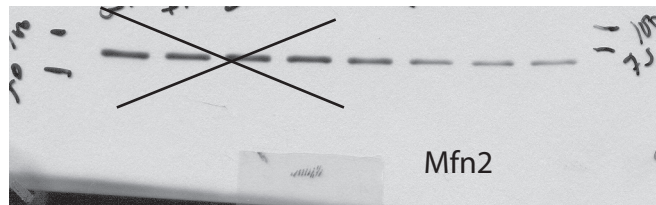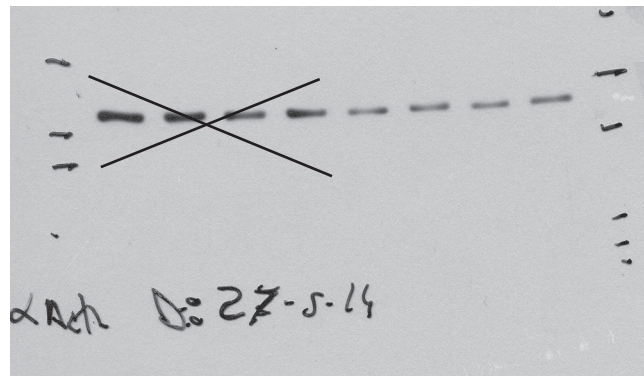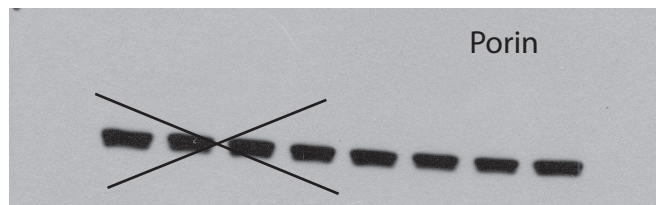

Supplement: embj0033-2388-sd14.pdf [file embj0033-2388-sd14.pdf]
